# Supplementary material for: Serum cell-free DNA and progression of diabetic kidney disease: a prospective study
Source: PubMed Central journal article supplement (PMC7064129; doi:10.1136/bmjdrc-2019-001078), 2020-03-09
Supplement: bmjdrc-2019-001078supp001.pdf [file bmjdrc-2019-001078supp001.pdf]

Supplementary Table 1. Baseline characteristics of the subjects completed and uncompleted the study

| Variable                               | Completed<br>(n=131)   | Uncompleted<br>(n=29)  | P value |
|----------------------------------------|------------------------|------------------------|---------|
| Men/women (person)                     | 73/58                  | 16/13                  | 0.411   |
| Age (year)                             | 62.30±6.37             | 62.31±6.38             | 0.697   |
| Duration of diabetes                   | 11.23±6.03             | 11.03±6.03             | 0.834   |
| BMI (kg/m <sup>2</sup> )               | 26.09±3.07             | 26.19±3.07             | 0.653   |
| WC (cm)                                | 97.32±6.93             | 97.41±6.92             | 0.521   |
| Smokers (%)                            | 48.85                  | 45.75                  | 0.578   |
| HT history (%)                         | 60.89                  | 60.85                  | 0.895   |
| ARB/ACEI usage(%)                      | 93.75                  | 93.79                  | 0.642   |
| FPG(mmol/l)                            | 7.91±2.43              | 7.881±2.43             | 0.484   |
| TC(mmol/l)                             | 4.11±0.99              | 4.11±1.00              | 0.693   |
| TG(mmol/l)                             | 2.01±2.05              | 2.01±2.06              | 0.821   |
| SBP(mmHg)                              | 136.34±16.34           | 136.30±16.69           | 0.533   |
| DBP(mmHg)                              | 74.27±10.26            | 74.46±10.30            | 0.631   |
| Creatinine(μmol/L)                     | 72.51±22.01            | 71.33±22.31            | 0.486   |
| Bun(mmol/L)                            | 6.00±1.68              | 5.98±1.68              | 0.454   |
| UA(μmol/L)                             | 354.46±100.94          | 355.84±101.41          | 0.383   |
| UACR(mg/g)                             | 75.55±76.67            | 75.85±77.04            | 0.499   |
| eGFR (ml/min per 1.73 m <sup>2</sup> ) | 90.81±24.47            | 90.81±24.56            | 0.526   |
| cfDNA(ng/mL)                           | 871.69(722.38,1027.51) | 871.71(722.60,1027.54) | 0.166   |

BMI: body mass index. WC: waist circumference. HT history: hypertension history. FPG: fast plasma glucose. TC: triglyceride. TG: total cholesterol. SBP: Systolic blood pressure. DBP: Diastolic blood pressure. BUN: blood urea nitrogen. UA: Uric acid eGFR: estimated glomerular filtration rate. cfDNA: cell free DNA.
